# Supplementary material for: PKCα diffusion and translocation are independent of an intact cytoskeleton
Source: PubMed Central journal article supplement (PMC5428563; doi:10.1038/s41598-017-00560-7), 2017-03-28
Supplement: 41598_2017_560_MOESM1_ESM.pdf [file 41598_2017_560_MOESM1_ESM.pdf]

**Title:** PKC $\alpha$  diffusion and translocation are independent of an intact cytoskeleton

**Authors:** Xin Hui<sup>1</sup>, Benjamin Sauer<sup>1</sup>, Lars Kaestner<sup>1</sup>, Karsten Kruse<sup>2</sup> Peter Lipp<sup>1\*</sup>

**One Sentence Summary:** Employing pharmacological and optical tools, we quantitatively demonstrate that the subcellular dynamicity of PKC $\alpha$  is driven by sole diffusion and independent of the integrity of the cytoskeleton.

**Affiliations:**

<sup>1</sup>Institute for Molecular Cell Biology, Research Centre for Molecular Imaging and Screening, Center for Molecular Signaling (PZMS), Medical Faculty, Saarland University, Homburg/Saar, Germany.

<sup>2</sup> Departments of Biochemistry and Theoretical Physics, University of Geneva, 30 quai Ernest-Ansermet, 1211 Geneva, Switzerland.

\*correspondence to peter.lipp@uks.eu

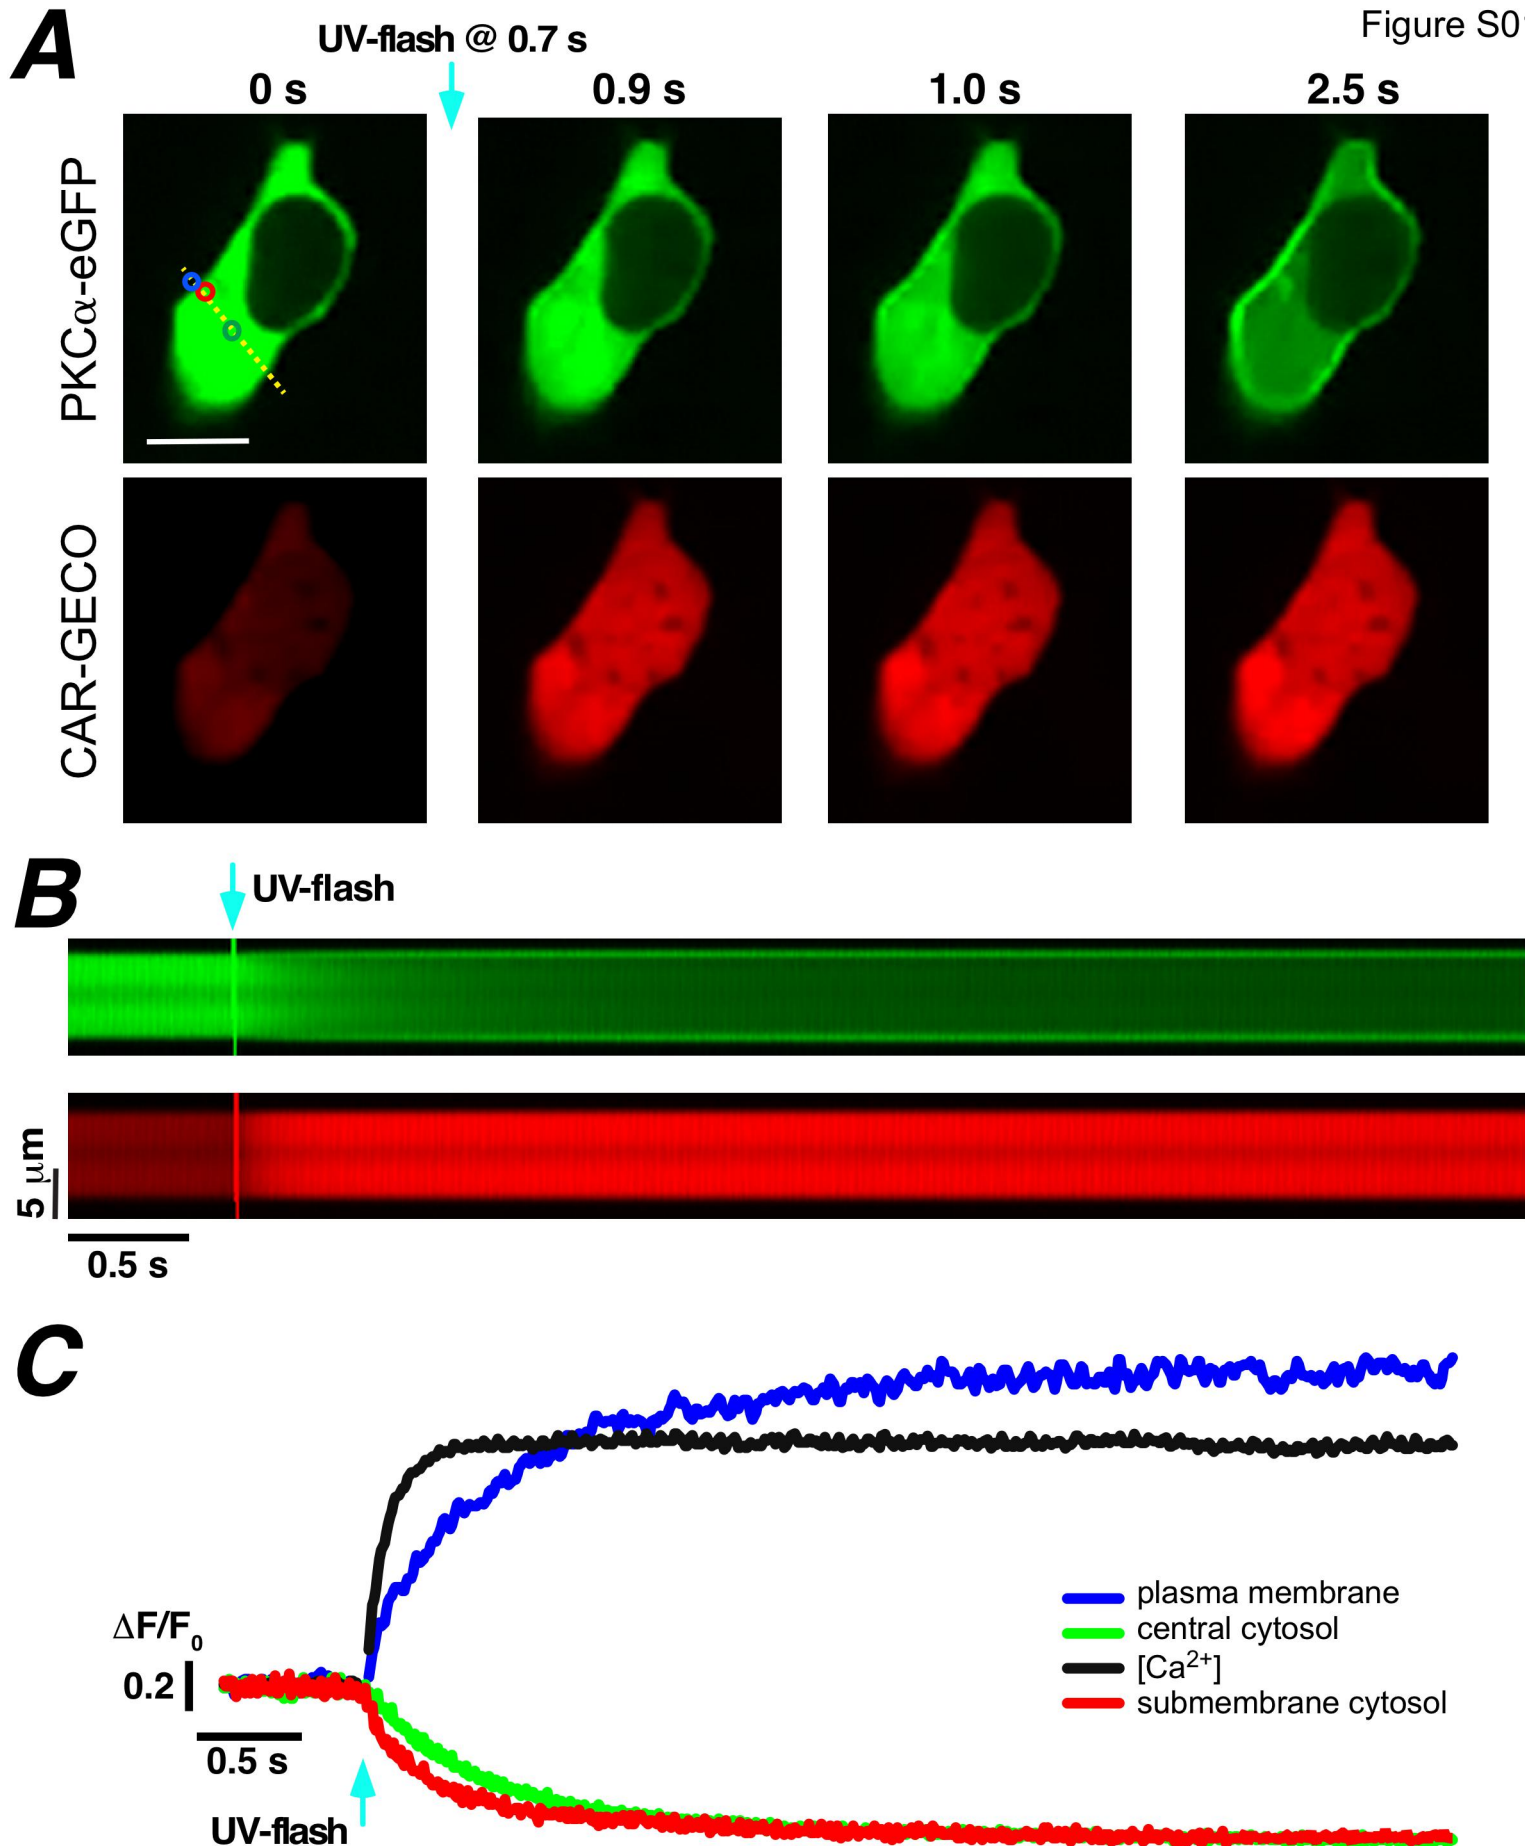

**Figure S01.** UV-flash evoked NP-EGTA uncaging results in a substantially faster Ca increase than Ca-dependent translocation of PKC $\alpha$ -eGFP. NP-EGTA-AM loaded HEK cells expressing PKC $\alpha$ -eGFP and the red-shifted genetically encoded Ca sensor CAR-GECO were subjected to a bright UV-flash at the time indicated by the turkis arrow. (A) upper row redistribution of PKC $\alpha$ -eGFP and lower row fluorescence changes of the CAR-GECO for the time points given. Scale bar depicts 10  $\mu$ m. (B) Pseudo-linescan along the yellow dashed line in (A) shows the redistribution of PKC $\alpha$ -eGFP and the fluorescence change of CAR-GECO. (C) fluorescence over time traces for the subcellular locations given. The flash artefact was removed for display reasons. Similar results were obtained from additional 15 cells from 3 independent experiments.

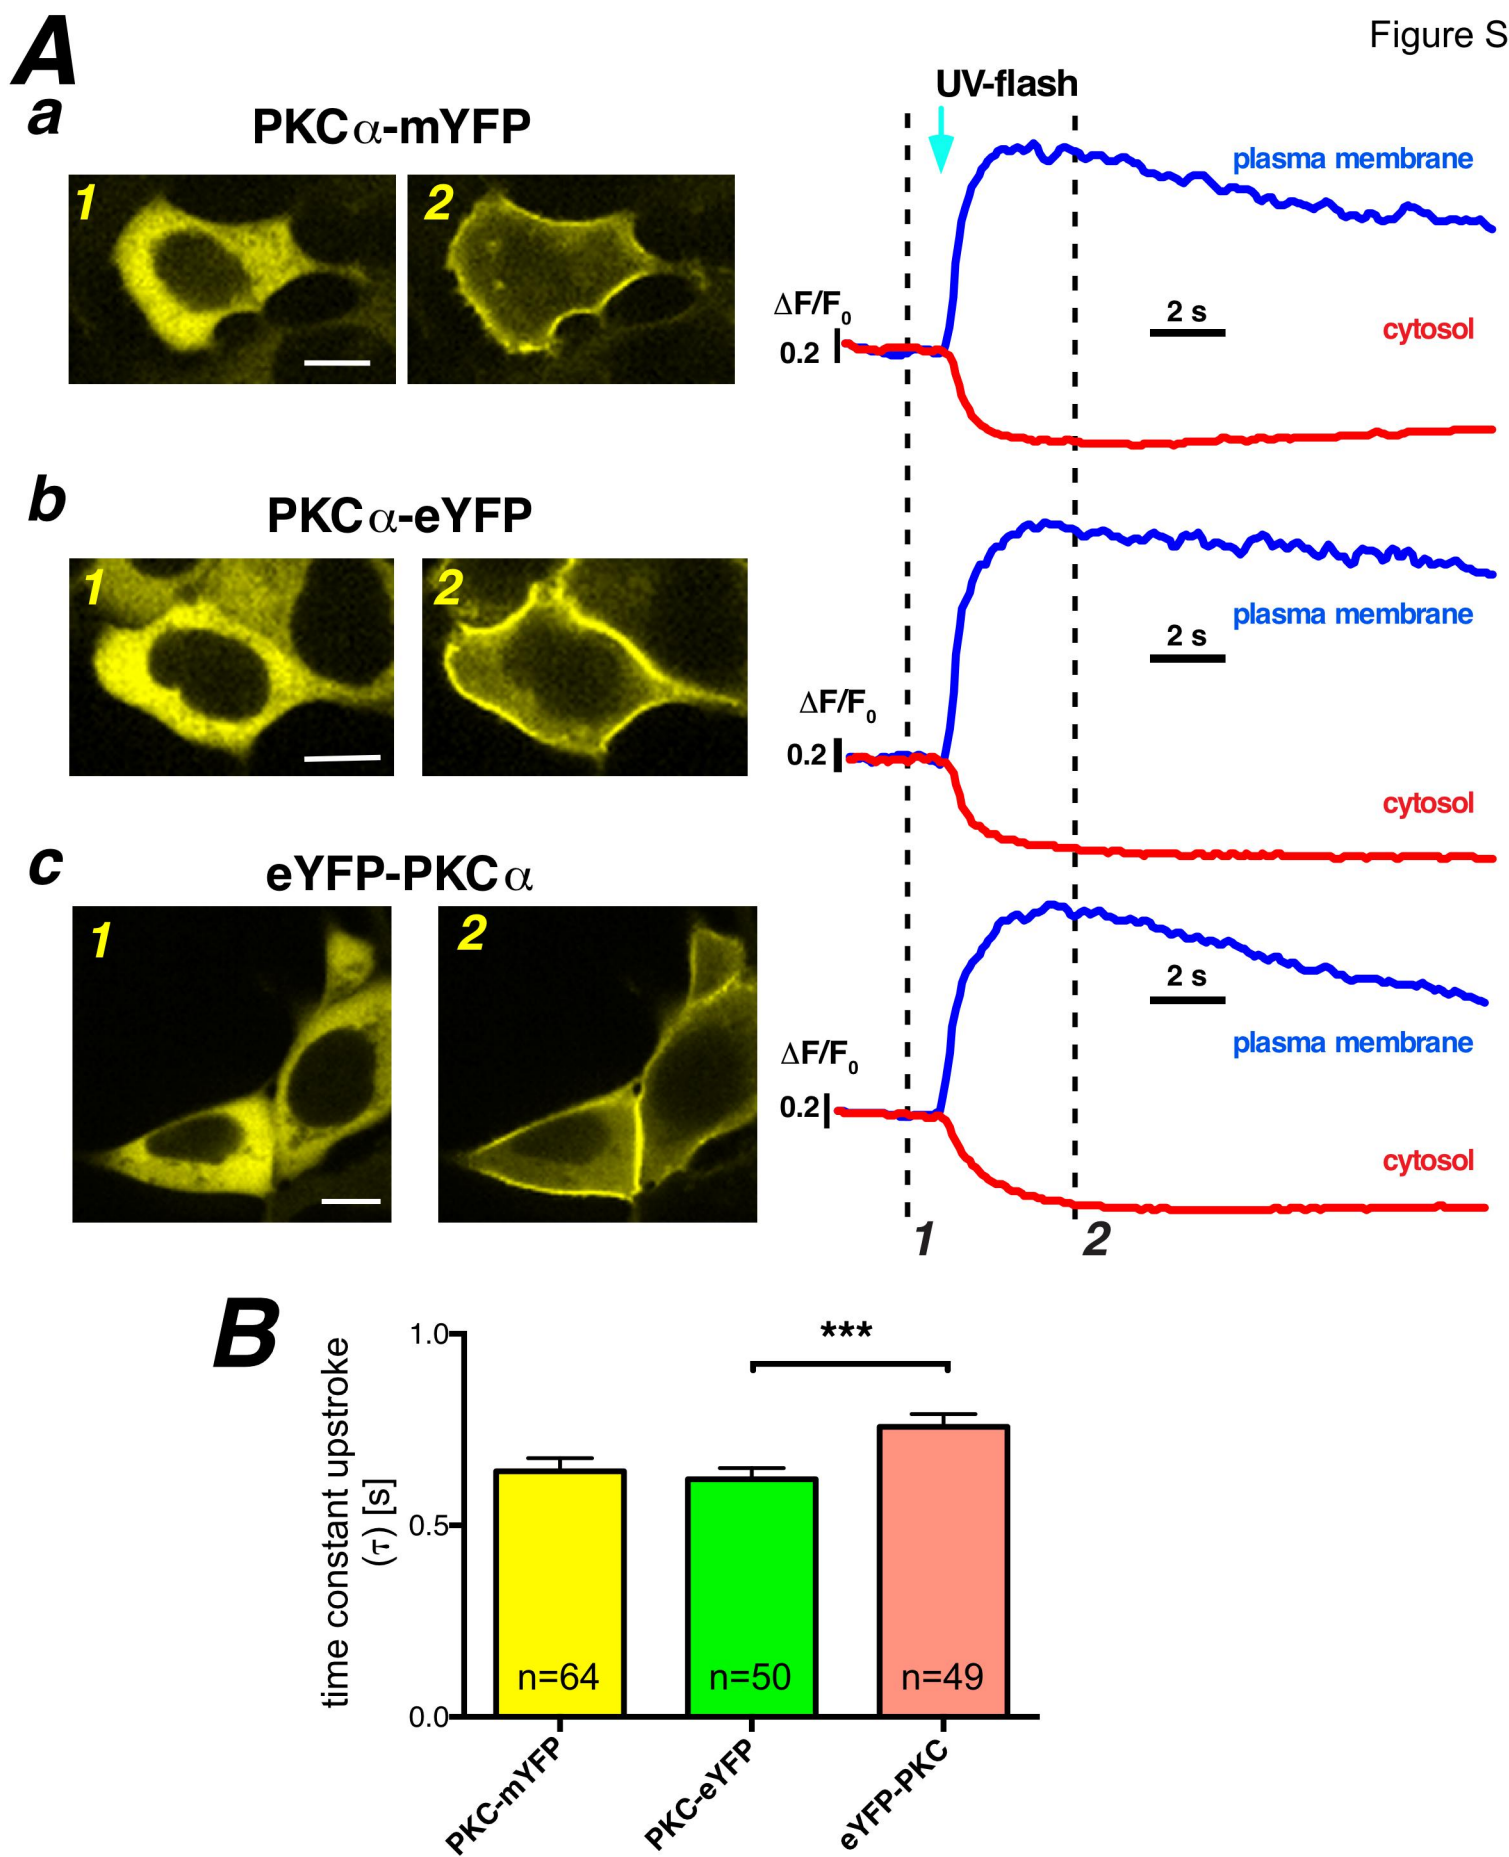

**Figure S02.** UV-flash evoked redistribution of PKC $\alpha$ -mYFP (Aa, B-yellow bar), PKC $\alpha$ -eYFP (Ab, B-green bar) and eYFP-PKC $\alpha$  (Ac, B-red bar). In (A) left panels depict exemplified confocal sections at the time points highlighted in the fluorescence over time traces in the right panels.
